# Supplementary material for: Natural Variation of Seed Tocopherol Composition in Diverse World Soybean Accessions from Maturity Group 0 to VI Grown in China
Source: MDPI journal article supplement (doi:10.3390/plants11020206), 2022-01-13
Supplement: s1 [file s1]

**Table S4.** Tocopherol composition ( $\mu\text{g g}^{-1}$ ) in soybean seeds from different maturity groups (MGs) across two years (2017 and 2018)

| MG  |       | $\alpha$ -Tocopherol | $\gamma$ -Tocopherol | $\delta$ -Tocopherol | Total-Tocopherol |
|-----|-------|----------------------|----------------------|----------------------|------------------|
| 0   | Mean  | 16.03 a              | 161.67 a             | 68.29 bc             | 245.99 a         |
|     | Range | 7.02-33.38           | 107.08-220.91        | 47.48-116.59         | 179.90-344.02    |
| I   | Mean  | 13.36 b              | 144.24 b             | 65.33 c              | 222.93 c         |
|     | Range | 5.03-25.99           | 79.31-183.86         | 21.87-103.35         | 118.92-286.65    |
| II  | Mean  | 10.76 c              | 145.54 b             | 72.36 b              | 228.66 bc        |
|     | Range | 4.24-20.04           | 95.12-180.71         | 41.08-121.19         | 154.68-274.47    |
| III | Mean  | 9.59 d               | 141.79 bc            | 79.63 a              | 231.02 b         |
|     | Range | 3.74-19.17           | 100.91-184.33        | 32.93-124.01         | 154.57-284.07    |
| IV  | Mean  | 8.33 e               | 134.71 d             | 80.32 a              | 223.36 bc        |
|     | Range | 4.65-27.09           | 92.17-171.58         | 48.93-129.54         | 152.18-289.74    |
| V   | Mean  | 8.32 e               | 136.72 cd            | 83.10 a              | 228.13 bc        |
|     | Range | 3.37-18.3            | 105.66-177.37        | 37.44-136.66         | 157.28-288.14    |
| VI  | Mean  | 7.95 e               | 131.32 d             | 81.70 a              | 220.97 c         |
|     | Range | 3.15-14.31           | 107.86-161.32        | 47.48-114.12         | 165.68-266.84    |

Here, values of means within each column with different letters indicate statistically significant differences at  $p < 0.05$ .

**Table S5.** Correlations between soybean tocopherol isomers and geographical factors <sup>a</sup>

| Geographical factor <sup>b</sup> | $\alpha$ -Tocopherol | $\gamma$ -Tocopherol | $\delta$ -Tocopherol | Total-Tocopherol |
|----------------------------------|----------------------|----------------------|----------------------|------------------|
| Latitude                         | 0.66***              | 0.49***              | −0.56***             | 0.13**           |
| Longitude                        | 0.13**               | −0.25***             | −0.016               | −0.18***         |
| Altitude                         | −0.14**              | −0.0097              | −0.053               | −0.063           |

<sup>a</sup> Values are represented as Pearson's correlation coefficients (*r*). \*\* and \*\*\* are significant at  $p < 0.01$  and  $p < 0.001$ , respectively. Values without asterisks are not significant at  $p < 0.05$ .

<sup>b</sup> Geographical factors (latitude, longitude, and altitude) data for the geographical origins of accessions were used in the correlation analysis.

**Table S6.** Variation in individual and total tocopherol contents of soybean accessions planted in two different locations for two years (2017 and 2018)

| Location | $\alpha$ -Tocopherol ( $\mu\text{g g}^{-1}$ ) | $\gamma$ -Tocopherol ( $\mu\text{g g}^{-1}$ ) | $\delta$ -Tocopherol ( $\mu\text{g g}^{-1}$ ) | Total-Tocopherol ( $\mu\text{g g}^{-1}$ ) |
|----------|-----------------------------------------------|-----------------------------------------------|-----------------------------------------------|-------------------------------------------|
| Beijing  | 8.82b                                         | 134.98b                                       | 76.34NS                                       | 220.15b                                   |
| Hainan   | 12.66a                                        | 150.65a                                       | 74.17NS                                       | 237.49a                                   |

Different lowercase letters (a and b) demonstrate statistically significant differences at the  $p < 0.05$  level; NS = non-significant

**Table S7.** Monthly temperature (°C), precipitation (mm), and sunshine (h) readings at the two experimental regions in China in 2017 and 2018

| <b>Hainan, Sanya</b>      |         |       |          |      |          |       |           |       |          |       |          |       |
|---------------------------|---------|-------|----------|------|----------|-------|-----------|-------|----------|-------|----------|-------|
| Month                     | October |       | November |      | December |       | January   |       | February |       | March    |       |
| Year                      | 2017    | 2018  | 2017     | 2018 | 2017     | 2018  | 2017      | 2018  | 2017     | 2018  | 2017     | 2018  |
| Max. (°C)                 | 29      | 28    | 28       | 24   | 25       | 22    | 24        | 23    | 24       | 24    | 27       | 34    |
| Mean (°C)                 | 28      | 24    | 26       | 21   | 23       | 18    | 22        | 19    | 22       | 19    | 25       | 28    |
| Min. (°C)                 | 25      | 21    | 23       | 20   | 20       | 16    | 19        | 16    | 19       | 15    | 22       | 24    |
| Rainfall (mm)             | 262.7   | 95.4  | 79.3     | 79.8 | 21.8     | 18.6  | 40.1      | 16.2  | 33.6     | 16    | 124.9    | 22.3  |
| Sunshine (h)              | 166.5   | 202.5 | 136      | 90.5 | 132.5    | 155.5 | 131       | 124.5 | 138      | 173.5 | 200      | 245   |
| <b>Beijing, Changping</b> |         |       |          |      |          |       |           |       |          |       |          |       |
| Month                     | June    |       | July     |      | August   |       | September |       | October  |       | November |       |
| Year                      | 2017    | 2018  | 2017     | 2018 | 2017     | 2018  | 2017      | 2018  | 2017     | 2018  | 2017     | 2018  |
| Max. (°C)                 | 30      | 33    | 37       | 33   | 36       | 32    | 32        | 26    | 20       | 21    | 11       | 14    |
| Mean (°C)                 | 28      | 28    | 35       | 29   | 34       | 28    | 29        | 21    | 18       | 19    | 9        | 11    |
| Min. (°C)                 | 23      | 22    | 31       | 25   | 30       | 24    | 24        | 17    | 15       | 15    | 6        | 8     |
| Rainfall (mm)             | 67      | 35.5  | 69.5     | 127  | 135.8    | 57.2  | 8.2       | 19    | 84.4     | 3.7   | 0        | 2.7   |
| Sunshine (h)              | 323.5   | 350.5 | 336      | 303  | 314      | 329   | 325       | 316   | 173.5    | 219   | 215      | 207.5 |
