# Supplementary material for: Natural Variation of Seed Tocopherol Composition in Diverse World Soybean Accessions from Maturity Group 0 to VI Grown in China
Source: MDPI journal article supplement (doi:10.3390/plants11020206), 2022-01-13

**Figure S1.** Relationship between means of soybean seed tocopherol composition ( $\mu\text{g g}^{-1}$ ) with maturity groups (MG 0–VI). (A)  $\alpha$ -Toc, (B)  $\gamma$ -Toc, (C)  $\delta$ -Toc, and (D) Total-Toc. Here, Toc represents tocopherol.

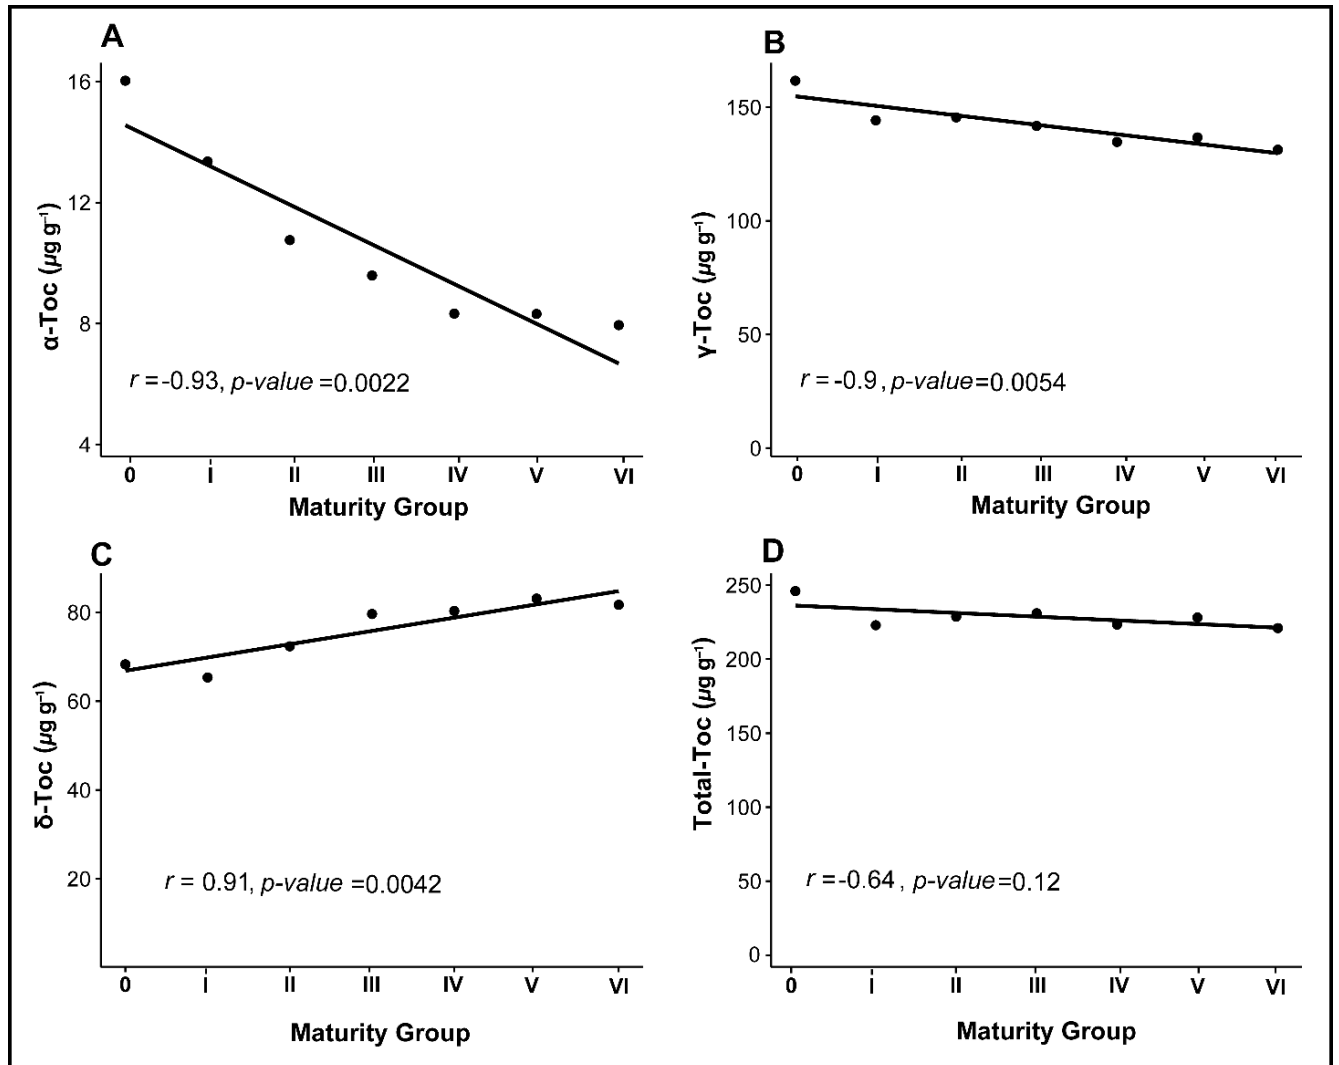

**Figure S2.** Geographical distribution of 493 maturity group (MG) materials in different geographic regions of the world. Here, NC, Northern China; HC, HuangHuaiHai China; SC, Southern China; FERU, Far-East of Russia; CRU, Central Russia; NUSA, Northern United States of America and SUSA, Southern United States of America. The different colour of dots represents different MG types of 493 accessions in 8 geographic regions. The maturity group materials are mapped according to their region of origin.

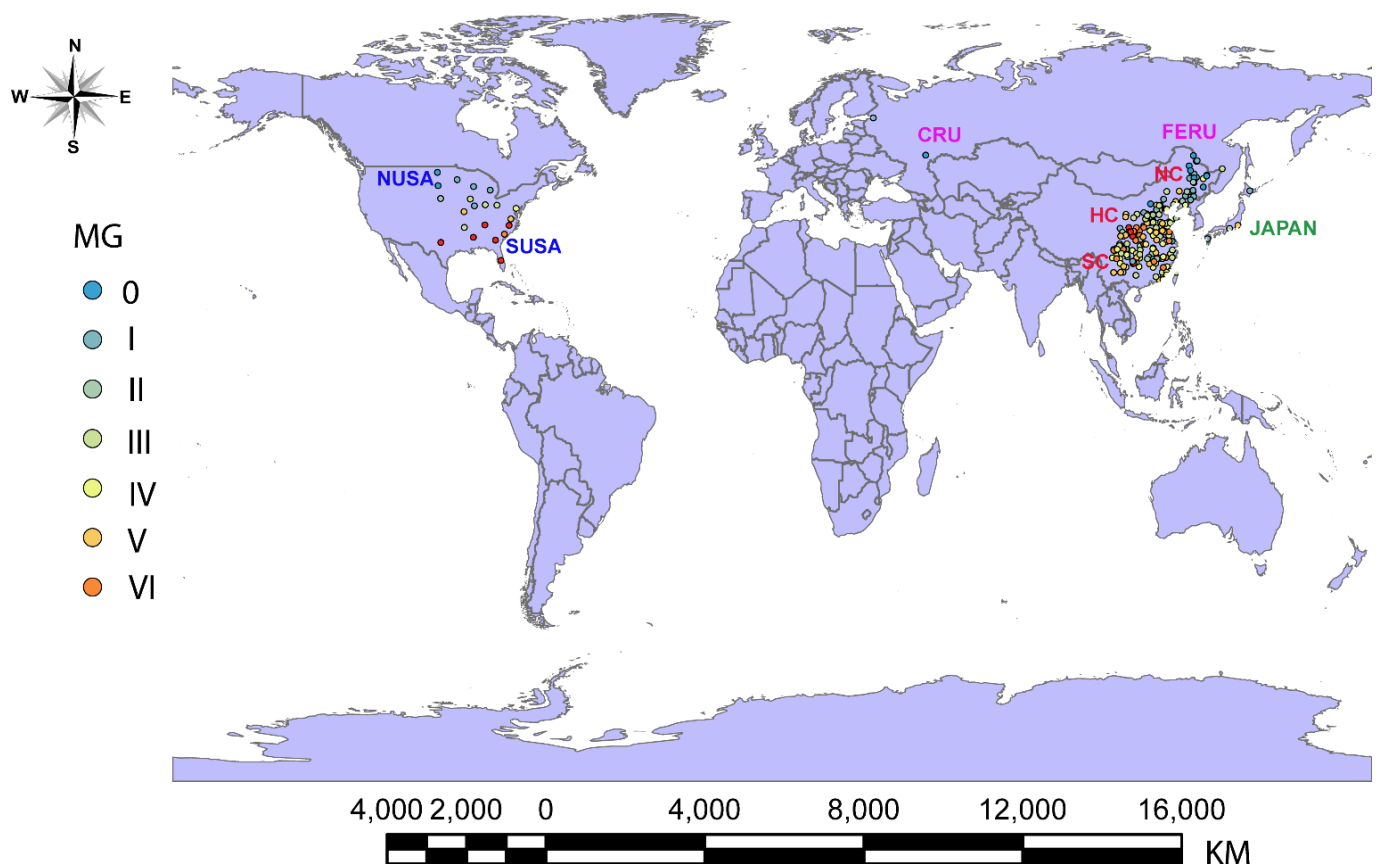

Supplement: s1 [file s1]
