# Supplementary material for: Natural Variation of Seed Tocopherol Composition in Diverse World Soybean Accessions from Maturity Group 0 to VI Grown in China
Source: Plants (Basel). 2022 Jan 13;11(2):206. doi: 10.3390/plants11020206 (PMC8779575; doi:10.3390/plants11020206)
Supplement: Supplementary file 1 [file plants-11-00206-s001.zip]

Archive with 4 entries (4 files):
- Figure S1-S2.pdf
- Table S1-S2.pdf
- Table S3.xlsx
- Table S4-S7.pdf
