# Supplementary material for: Natural Variation of Seed Tocopherol Composition in Diverse World Soybean Accessions from Maturity Group 0 to VI Grown in China
Source: Plants (Basel). 2022 Jan 13;11(2):206. doi: 10.3390/plants11020206 (PMC8779575; doi:10.3390/plants11020206)
Supplement: Supplementary file 1 [file plants-11-00206-s001.zip › Table S3.xlsx]

## Sheet: Sheet1
Table S3. Information of the 493 accessions used in this study
Sr.#	ID. Number	Name	Origin	MG
1	ZDD00023	Dongnong4	China	0
2	ZDD00043	Heihe51	China	0
3	ZDD00059	Mufeng1	China	0
4	ZDD06836	Suinong6	China	0
5	ZDD17668	Heihe5	China	0
6	ZDD17669	Heihe6	China	0
7	ZDD17672	Heihe9	China	0
8	ZDD22663	heihe13	China	0
9	ZDD22665	Heihe15	China	0
10	ZDD18582	Heihe30	China	0
11	ZDD03733	heihe31	China	0
12	ZDD23732	Jiyu67	China	0
13	ZDD23858	Mengdou12	China	0
14	ZDD24321	Heihe39	China	0
15	ZDD24329	Heihe50	China	0
16	ZDD24331	Beifeng9	China	0
17	ZDD24330	Heihe51	China	0
18	ZDD24325	Heihe43	China	0
19	ZDD19515	Heihe18	China	0
20	Dongsheng7	Dongsheng7	China	0
21	WDD02675	G.maxN136	Russia	0
22	WDD02995	PI 468903	China	0
23	WDD00524	Vinton 81	USA	0
24	PI542769	Proto	USA	0
25	WDD02015	TBD	USA	0
26	PI548501	Wilkin	USA	0
27	PI615585	Sargent	USA	0
28	WDD02989	Pin-din-guan	China	0
29	ZDD14319	sumaozuan	China	0
30	WDD02643	G.max-46	Russia	0
31	ZDD00041	heihe1	China	0
32	ZDD00076	suinong1	China	0
33	ZDD06819	nenfeng11	China	0
34	PI548283	T307	USA	0
35	ZDD04430	TXAJH	China	0
36	PI494182	Suzuhime	Japan	0
37	PI437090	DV-206	Russia	0
38	PI602897	Jim	USA	0
39	PI592523	Glacier	USA	0
40	PI629004	MN0201	USA	0
41	WDD01715	Traill	USA	0
42	WDD02019	9234	USA	0
43	PI599300	Surge	USA	0
44	WDD02702	MONETA	Russia	0
45	ZDD00042	Heihe3	China	0
46	ZDD00044	Heihe54	China	0
47	WDD01273	Tenpokushirome	Japan	0
48	ZDD17713	Dongnong47-1C	China	0
49	ZDD22657	Hefeng35	China	0
50	ZDD22660	Heihe10	China	0
51	ZDD23602	Hefeng40	China	0
52	ZDD23604	Hefeng42	China	0
53	ZDD23615	hefeng47	China	0
54	ZDD23628	heihe26	China	0
55	ZDD24320	Heihe38	China	0
56	ZDD24324	Heihe42	China	0
57	ZDD24336	Huajiang4	China	0
58	ZDD24346	Kenfeng22	China	0
59	ZDD24362	Beidou5	China	0
60	ZDD24376	Hefeng52	China	0
61	ZDD24601	Mengdou14	China	0
62	13QS040(S)	Keshan1	China	0
63	ZDD23629	heihe27	China	0
64	ZDD06815	heihe4	China	0
65	ZDD22682	ke4430-20	China	0
66	ZDD23626	heihe24	China	0
67	ZDD24315	heihe32	China	0
68	WDD02790	SOER-3	Russia	0
69	ZDD00025	Fengsshou1	China	I
70	WDD02913	2846	Russia	I
71	ZDD00159	Yangjiaomi	China	I
72	ZDD00219	Yapoche	China	I
73	ZDD00250	Baimaoshuang	China	I
74	ZDD00261	HLDLD	China	I
75	ZDD00393	Ha1	China	I
76	PI548509	Dunn	USA	I
77	ZDD00651	Dahongqi	China	I
78	ZDD00686	Heidou	China	I
79	ZDD00745	Jindou33	China	I
80	WDD02958	POLUKULTURYA-2	Russia	I
81	WDD02708	PSB313	Russia	I
82	WDD02897	PSB609	Russia	I
83	ZDD22643	Dongnong42	China	I
84	ZDD22653	Kennong4	China	I
85	ZDD23636	heinong43	China	I
86	ZDD23645	Hongfeng11	China	I
87	ZDD24342	Kenfeng13	China	I
88	ZDD24344	Kenfeng16	China	I
89	ZDD24345	Kenfeng17	China	I
90	ZDD24374	Hefeng50	China	I
91	ZDD24378	Hefeng55	China	I
92	ZDD24399	Suinong26	China	I
93	ZDD24406	Heinong48	China	I
94	ZDD24424	Dongnong50	China	I
95	PI539863	HP202	USA	I
96	Dongnong42A	Dongnong42A	China	I
97	Dongnong42C	Dongnong42C	China	I
98	ZDD22798	Dongnong42E	China	I
99	ZDD24565	Liaodou26	China	I
100	Liaodou24	Liaodou24	China	I
101	Liaodou32	Liaodou32	China	I
102	Liaodou37	Liaodou37	China	I
103	Liao08012	Liao08012	China	I
104	Liao08024	Liao08024	China	I
105	Longpin13-369	Longpin13-369	China	I
106	Longpin10-217	Longpin10-217	China	I
107	Jiyu105	Jiyu105	China	I
108	Jiyu108	Jiyu108	China	I
109	Jiyu109	Jiyu109	China	I
110	Jiyu204	Jiyu204	China	I
111	ZKMD2	ZKMD2	China	I
112	Kariyutaka	Kariyutaka	Japan	I
113	WDD01202	Japan Ⅰ	Japan	I
114	WDD01226	Jan_01	Japan	I
115	WDD00626	Ooyachi-2	Japan	I
116	ZDD10987	HPXHD	China	I
117	ZDD06558	xindadou1	China	I
118	WDD01253	Akihachi	Japan	I
119	WDD01264	Hachinohe howaitopaku	Japan	I
120	WDD01252	Tokachi nagaha	Japan	I
121	ZDD11235	SQDDD	China	I
122	ZDD11343	THYGZ	China	I
123	ZDD18657	ZJGHD	China	I
124	ZDD12479	YCBYH1	China	I
125	ZDD12832	NTNBD	China	I
126	WDD01215	Saikai 20	Japan	I
127	WDD01267	Shiromedaizu	Japan	I
128	ZDD16617	huangdouzi-4	China	I
129	ZDD00603	CCMCJ	China	I
130	ZDD00021	heinong26	China	I
131	ZDD00294	qingdou	China	I
132	ZDD18080	kai8157-3-3-1	China	I
133	ZDD08650	huangdou<2>	China	I
134	ZDD00003	heinong2	China	I
135	ZDD23181	jinpin82	China	I
136	ZDD18529	maoyandou	China	I
137	ZDD04429	TXHD	China	I
138	ZDD07218	zihua2	China	I
139	ZDD07489	THPDX	China	I
140	PI548571	Harlon	USA	I
141	PI614833	NE1900	USA	I
142	PI608438	Titan	USA	I
143	WDD02225	L72-920	USA	I
144	Kitamishiro	Kitamishiro	Japan	I
145	WDD02155	Tsurukogane	Japan	I
146	WDD02238	MN1900	USA	I
147	WDD02152	Suzumaru	Japan	I
148	PI602593	MN1301	USA	I
149	WDD02282	Daanli	Japan	I
150	WDD02848	PSB543	Russia	I
151	PI634335	LS94-3207	USA	I
152	PI591522	L88-8153	USA	II
153	ZDD00081	Jingshanpu	China	II
154	PI646157	S01-9391	USA	II
155	PI543855	Newton	USA	II
156	PI532833	T308	USA	II
157	ZDD07244	Zhengguang1	China	II
158	ZDD07644	KYBH	China	II
159	ZDD17882	JLXL1	China	II
160	ZDD23704	Jilin30	China	II
161	ZDD23714	Jiyu48	China	II
162	PI641937	JTN5303	USA	II
163	WDD02002	PN9394	USA	II
164	ZDD24477	jiyu101	China	II
165	JLXLD7	JLXLD7	China	II
166	jiyu86	jiyu86	China	II
167	jiyu404	jiyu404	China	II
168	jiyu406	jiyu406	China	II
169	jiyu302	jiyu302	China	II
170	jimidou2	jimidou2	China	II
171	ZDD14240	Ls15	China	II
172	PI547694	L65-756	USA	II
173	ZDD23737	jiyu72	China	II
174	WDD01574	Conrad	USA	II
175	ZDD08705	dahuangdou1	China	II
176	PI547761	L73-105	USA	II
177	PI548512	Century	USA	II
178	PI546375	Amcor 89	USA	II
179	WDD02873	PSB576	Russia	II
180	ZDD11091	huohuangdou	China	II
181	ZDD03049	Manchu 2204	China	II
182	ZDD18847	jindou15	China	II
183	WDD00412	Cloud	China	II
184	ZDD23910	jidou15	China	II
185	WDD02872	PSB575	Russia	II
186	PI548510	Beeson	USA	II
187	PI548608	Provar	USA	II
188	PI547816	L83-4387	USA	II
189	qihuang38	qihuang38	China	II
190	qihuang39	qihuang39	China	II
191	PI540556	Jack	USA	II
192	PI547729	L67-153	USA	II
193	WDD01968	Harosoy	USA	II
194	WDD01486	Century-lx1.3	USA	II
195	PI548540	Corsoy	USA	II
196	WDD01487	Century 23	USA	II
197	ZDD19339	8588	China	II
198	ZDD19368	YHSH	China	II
199	ZDD19379	Wei8640-112	China	II
200	PI547453	L63-2404	USA	II
201	ZDD06514	xiangdou3	China	II
202	ZDD11569	HPHD	China	II
203	ZDD11575	huasedou	China	II
204	ZDD14267	chunhuidou	China	II
205	PI548506	Amsoy	USA	II
206	WDD00803	Riben54(Aizhixian)	Japan	II
207	ZDD24194	xiangchundou10	China	II
208	ZDD25213	xiangchundou26	China	II
209	ZDD12237	heinidou	China	II
210	PI543857	Gnome85	USA	II
211	ZDD23873	zhonghuang10	China	II
212	ZDD00854	jinzhou4-1	China	II
213	ZDD07217	jilin20	China	II
214	ZDD18632	jidou7	China	II
215	WDD00329	L83-544	USA	II
216	ZDD23131	fendou49	China	II
217	ZDD07088	LQDD(heqi)	China	II
218	ZDD14252	FCZWD	China	II
219	ZDD06515	xiangdou4	China	II
220	WDD02148	Chohckuzan	Japan	II
221	ZDD19105	yanhuang3	China	II
222	PI561858	Holt	USA	II
223	WDD01974	Flint	USA	II
224	PI533655	Burlison	USA	II
225	WDD03008	Tousan kei 75	Japan	II
226	WDD00405	Yellow Morvel	USA	II
227	JLXLDCK	JLXLDCK	China	II
228	PI591514	L84-2157	USA	II
229	WDD02355	Yumeyutaka	Japan	II
230	jimidou3	jimidou3	China	II
231	ZDD18856	jinpin19	China	III
232	ZDD18887	jindou19	China	III
233	ZDD23867	kefeng14	China	III
234	ZDD23877	zhonghuang14	China	III
235	ZDD23883	zhonghuang20	China	III
236	ZDD23891	zhongdou27	China	III
237	ZDD23987	jindou21	China	III
238	ZDD23992	jindou28	China	III
239	ZDD24002	jindou25	China	III
240	ZDD24054	zheng98005	China	III
241	ZDD24065	xudou11	China	III
242	ZDD24113	Hedou2	China	III
243	ZDD24626	kexin3	China	III
244	ZDD24636	zhonghuang35	China	III
245	ZDD24638	zhonghuang37	China	III
246	ZDD24685	jidou17	China	III
247	qihuang34	qihuang34	China	III
248	qihuang35	qihuang35	China	III
249	qihuang36	qihuang36	China	III
250	qihuang40	qihuang40	China	III
251	qihuang41	qihuang41	China	III
252	qihuang42	qihuang42	China	III
253	zhonghuang68	zhonghuang68	China	III
254	zhongzuo09-560	zhongzuo09-560	China	III
255	ZDD12463	LSDD	China	III
256	ZDD12668	QSHKZ2	China	III
257	ZDD12746	SCQPD	China	III
258	ZDD12753	PXLYH	China	III
259	ZDD12825	ZJHHD	China	III
260	ZDD13152	daqingdou	China	III
261	ZDD13840	zhechun2	China	III
262	ZDD21030	PSHKZ-3	China	III
263	ZDD21171	PXHPD	China	III
264	ZDD21208	zhechun3	China	III
265	ZDD06361	dapudou	China	III
266	ZDD25115	zhexiandou2	China	III
267	ZDD25146	gandou2	China	III
268	ZDD18394	kefeng1	China	III
269	ZDD25129	quxian3	China	III
270	ZDD25258	huachun2	China	III
271	ZDD06763	LCSYH	China	III
272	ZDD11753	nidouzi	China	III
273	ZDD12212	heidadou	China	III
274	ZDD14729	LSHPD	China	III
275	ZDD14835	AJHD-1	China	III
276	ZDD22104	XQHD	China	III
277	zhonghuang688	zhonghuang688	China	III
278	WDD02102	7570	China	III
279	ZDD00610	niumaohuang	China	III
280	ZDD01402	daliheidou	China	III
281	ZDD23896	zhongpin95-5383	China	III
282	ZDD23885	Zhonghuang22	China	III
283	ZDD08033	Zaoshu 7 hao	China	III
284	WDD02625	C∏1271	Russia	III
285	PI548168	T116H	USA	III
286	PI591531	L89-2435	USA	III
287	PI534647	GR8836	USA	III
288	WDD02917	PSB640	Russia	III
289	WDD02880	CHESTNUT	Russia	III
290	WDD03005	Tousan 83	Japan	III
291	WDD02303	M044	USA	III
292	WDD03003	M045	USA	III
293	WDD03006	Tousan kei 5	Japan	III
294	WDD00410	Chustnut	USA	III
295	WDD02802	PSB471	Russia	III
296	PI635039	S99-3181	USA	III
297	WDD01599	Kunitz	USA	III
298	WDD00341	L81-4590	USA	III
299	PI547879	L87-0482	USA	III
300	WDD02920	FUN-ZHUN/g	Russia	III
301	PI547862	L83-570	USA	III
302	PI540551	Hobbit	USA	III
303	WDD01871	T219H	USA	III
304	PI587185	Probst	USA	III
305	PI583835	Mercury	USA	III
306	PI547860	L82-1858	USA	III
307	PI547857	L81-4420	USA	III
308	PI547866	L83-4744	USA	III
309	WDD00949	CN 344	USA	III
310	WDD02914	2849	Russia	III
311	WDD00586	Williams79	USA	III
312	WDD00587	Williams82	USA	III
313	PI546373	Hobbit87	USA	III
314	WDD00585	Williams	USA	III
315	PI595753	Odell	USA	III
316	PI546374	Sprite87	USA	III
317	PI548166	T102	USA	III
318	PI595926	Athow	USA	III
319	PI548634	Zane	USA	III
320	PI578057	Saline	USA	III
321	PI548556	Elf	USA	III
322	PI567902	Charleston	USA	III
323	PI648270	Osage	USA	III
324	PI548290	T316	USA	III
325	WDD02599	C∏691	Russia	III
326	WDD02286	Guandong102	Japan	III
327	ZDD00267	Xiaobaidou	China	IV
328	ZDD23277	Zheng92116	China	IV
329	ZDD23684	Suinong20	China	IV
330	ZDD24531	Tiefeng29	China	IV
331	ZDD08094	XHHD	China	IV
332	ZDD08160	GJWDJY	China	IV
333	ZDD08230	DSDQD	China	IV
334	ZDD18928	fendou31	China	IV
335	ZDD23893	zhongpin661	China	IV
336	ZDD24022	Qihuang31	China	IV
337	ZDD24724	jinda78	China	IV
338	ZDD24757	puhai10	China	IV
339	ZDD24759	pudou206	China	IV
340	fendou78	fendou78	China	IV
341	ZDD02571	MPPDH	China	IV
342	ZDD02615	yingxuan23	China	IV
343	PI547786	L79-842	USA	IV
344	ZDD08489	xiaoheidou	China	IV
345	ZDD08494	xiaoheiidou	China	IV
346	ZDD09929	pingdinghuang	China	IV
347	ZDD19405	yudou11	China	IV
348	ZDD19410	zheng492(yudou22)	China	IV
349	ZDD19714	chuxiu	China	IV
350	ZDD12331	xiaobaimao	China	IV
351	ZDD12353	huangmaomao	China	IV
352	ZDD12500	JLGJYH	China	IV
353	ZDD12575	BXJDH	China	IV
354	ZDD12680	JWQSD	China	IV
355	ZDD12944	baimaodou-2	China	IV
356	ZDD13117	baojiaohuang	China	IV
357	ZDD13135	qingpidoou	China	IV
358	PI548645	Pharaoh	USA	IV
359	ZDD13149	qingpidou	China	IV
360	ZDD13849	zidou	China	IV
361	ZDD14227	JXLYB	China	IV
362	ZDD14232	huangdou	China	IV
363	ZDD06595	maojihui	China	IV
364	ZDD14981	DBSD-2	China	IV
365	ZDD15144	QYZHD-1	China	IV
366	WDD00623	Asahi rokojugo	Japan	IV
367	ZDD24823	fudou9765	China	IV
368	ZDD24856	chuandou4	China	IV
369	13QS233	quandou7	China	IV
370	ZDD04461	chunhua5	China	IV
371	ZDD11453	xinliuqing	China	IV
372	ZDD12121	jiuyuehan	China	IV
373	ZDD14663	SNBYH<YI>	China	IV
374	ZDD14709	QPQD	China	IV
375	ZDD14731	XHHD	China	IV
376	PI543794	Delsoy4900	USA	IV
377	ZDD20441	zhongdou14	China	IV
378	PI547551	L72-1879	USA	IV
379	ZDD14218	huangdou	China	IV
380	ZDD02764	siliyuan	China	IV
381	PI547403	L60-246(Clark63)	USA	IV
382	ZDD19131	maodou	China	IV
383	PI548547	Cutler	USA	IV
384	ZDD22985	qingpihuang	China	IV
385	PI547439	L67-3479	USA	IV
386	PI547428	L65-763	USA	IV
387	ZDD19409	zheng84240-B1（yudou18）	China	IV
388	ZDD06358	DSBMD	China	IV
389	ZDD24713	jindou39	China	IV
390	ZDD21485	quanbian11	China	IV
391	ZDD10100	zheng8516	China	IV
392	PI548669	Carlin	USA	IV
393	ZDD06375	daqingren	China	IV
394	ZDD20652	2340322	China	IV
395	PI438498	Sable	USA	IV
396	PI200495	Kuro Daizu	Japan	IV
397	PI438489	Chiquita	USA	IV
398	PI614155	NS93-4118	USA	IV
399	PI534646	Flyer	USA	IV
400	PI598222	TN4-94	USA	IV
401	PI559932	Manokin	USA	IV
402	PI548563	Franklin	USA	IV
403	PI512039	Pyramid	USA	IV
404	PI548187	T171	USA	IV
405	WDD00476	Wilson Five B	China	IV
406	WDD00475	Wilson Five	China	IV
407	PI548205	T221	USA	IV
408	ZDD24157	quxian1	China	IV
409	ZDD00717	Heimodou	China	V
410	ZDD07727	Qingerhei	China	V
411	PI642422	Hartwig	USA	V
412	PI548977	Epps	USA	V
413	PI533605	Cordell	USA	V
414	PI544354	Walters	USA	V
415	PI548655	Forrest	USA	V
416	PI559370	Mack	USA	V
417	PI553052	Narow	USA	V
418	ZDD08013	FSHD-1	China	V
419	ZDD08101	LTWZHD	China	V
420	ZDD08213	XZDHD	China	V
421	ZDD08237	DQPHD	China	V
422	ZDD24101	wandou16	China	V
423	wandou33	wandou33	China	V
424	ZDD01890	PDHHD	China	V
425	ZDD08537	jiangssedou	China	V
426	ZDD11150	zhenzhuai	China	V
427	ZDD11183	honghuangdou	China	V
428	ZDD11192	mahuangdou	China	V
429	ZDD19144	qisiwa	China	V
430	ZDD19963	XI19	China	V
431	ZDD14586	YXHD	China	V
432	ZDD20666	xidou3	China	V
433	ZDD21178	QJHD	China	V
434	ZDD06638	baishuidou	China	V
435	ZDD14092	jinpengdou	China	V
436	ZDD14911	xihuangdou-9	China	V
437	PI631157	D96-1217	USA	V
438	wandou35	wandou35	China	V
439	ZDD25282	dian86-5	China	V
440	huaxia1	huaxia1	China	V
441	ZDD05504	edou2	China	V
442	ZDD11586	82-16	China	V
443	ZDD11638	jingdou26	China	V
444	PI548974	Bedford	USA	V
445	ZDD14742	BJCHD	China	V
446	ZDD00921	tianedan	China	V
447	ZDD09279	xiaoheidou	China	V
448	ZDD18870	dongshan69	China	V
449	ZDD06562	baimaodou	China	V
450	ZDD08697	yuxuan13	China	V
451	ZDD02559	cansidou	China	V
452	ZDD03533	ZCXHD	China	V
453	ZDD14910	xihuangdou-8	China	V
454	ZDD02921	qing6	China	V
455	ZDD02864	PDHD	China	V
456	ZDD03237	ZCJWH	China	V
457	PI633609	Lonoke	USA	V
458	PI548402	Peking	China	V
459	PI612146	Bolivar	USA	V
460	PI597388	Accomac	USA	V
461	PI561400	Rhodes	USA	V
462	WDD02292	Zhongte1	Japan	V
463	ZDD08603	YZY2004-15-15W83	China	VI
464	ZDD09581	DLHD	China	VI
465	ZDD09832	qingdou	China	VI
466	ZDD09850	guilianbaidou	China	VI
467	ZDD10248	Lvdadou	China	VI
468	PI515960	Sharkey	USA	VI
469	PI511813	Twiggs	USA	VI
470	ZDD03991	XYNZZ	China	VI
471	PI542712	Bryan	USA	VI
472	PI548988	Pickett	USA	VI
473	ZDD10665	bayuezha	China	VI
474	ZDD10734	heidou	China	VI
475	ZDD11159	HLHD	China	VI
476	ZDD19465	HLSP	China	VI
477	ZDD12828	SNFTJSD	China	VI
478	ZDD14221	XLWYD	China	VI
479	ZDD13409	baishuidou	China	VI
480	ZDD13802	luoshi-1	China	VI
481	ZDD16052	liuyuemang	China	VI
482	ZDD14190	baiqiu1	China	VI
483	ZDD11226	GYHBH	China	VI
484	ZDD13088	liuyuezao-1	China	VI
485	ZDD10499	bayuezao	China	VI
486	ZDD09160	daqingdou	China	VI
487	ZDD04604	YZDLHD	China	VI
488	PI438342	Laredo J 767	USA	VI
489	ZDD21907	XYDLQ	China	VI
490	WDD00472	Sooty	China	VI
491	PI592756	Dillon	USA	VI
492	PI617045	NC-Roy	USA	VI
493	PI599333	Musen	USA	VI
